# Supplementary material
Source: publisher site journal article supplement (https://www.kjim.org/upload/media/kjim-2024-314-supplementary-table-1.pdf)
Supplement: Supplementary file 1 [file kjim-2024-314-supplementary-table-1.pdf]

**Supplementary Table 1. Change in BSS from baseline**

| Parameter                                  | HL-301                | Erdosteine            | <i>p</i> value      |
|--------------------------------------------|-----------------------|-----------------------|---------------------|
| Full analysis set                          |                       |                       |                     |
| No. of patients                            | 54                    | 55                    |                     |
| Baseline (score)                           | 5.72 ± 1.00           | 5.87 ± 1.00           | 0.338 <sup>a)</sup> |
| Day 7 (score)                              | 1.28 ± 1.32           | 1.55 ± 1.42           | 0.288 <sup>a)</sup> |
| Change                                     | -4.44 ± 1.49          | -4.33 ± 1.54          |                     |
| <i>p</i> value (within group)              | < 0.001 <sup>b)</sup> | < 0.001 <sup>c)</sup> |                     |
| Difference (95% CI) (between group)        | 0.12 (-0.40, 0.63)    |                       | 0.773 <sup>a)</sup> |
| Difference in LSM (95% CI) (between group) | 0.22 (-0.29, 0.74)    |                       | 0.392 <sup>d)</sup> |

Data are expressed as mean ± standard deviation.

BSS, Bronchitis Severity Score; CI, confidence interval; LSM, least square mean.

<sup>a)</sup>Wilcoxon rank sum test. <sup>b)</sup>Paired t-test. <sup>c)</sup>Wilcoxon signed rank test. <sup>d)</sup>ANCOVA model with baseline value as covariate.
